# Supplementary material for: Occurrence of Aflatoxins in Edible Vegetable Seeds and Oil Samples Available in Retail Markets and Estimation of Dietary Intake in Consumers
Source: Preprints.org preprint supplement (doi:10.20944/preprints202103.0681.v1), 2021-03-29
Supplement: Supplementary file 2 [file supplementary]

**Sunflower oil and seeds**

| **Branded oil** | | | **Unbranded oil** | | | **Branded seeds** | | | **Unbranded seeds** | | |
| --- | --- | --- | --- | --- | --- | --- | --- | --- | --- | --- | --- |
| **SR. #** | **AFB1** | **TAFs** | **SR.#** | **AFB1** | **TAFs** | **SR. #** | **AFB1** | **TAFs** | **SR.#** | **AFB1** | **TAFs** |
| 1 | 4.50 | 9.10 | 1 | 10.5 | 13.5 | 1 | 4.3 | 11.3 | 1 | 6.7 | 18.5 |
| 2 | 7.80 | 13.5 | 2 | 9.6 | 14.5 | 2 | 6.5 | 18.9 | 2 | 6.8 | 21.5 |
| 3 | 3.50 | 11.70 | 3 | 2.5 | 13.5 | 3 | 5.7 | 20.6 | 3 | 8.5 | 22.4 |
| 4 | 6.78 | 12.50 | 4 | 7.7 | 14.5 | 4 | 6.5 | 13.6 | 4 | 8.5 | 15.5 |
| 5 | 15.80 | 25.70 | 5 | 22.8 | 28.9 | 5 | 123.5 | 140.7 | 5 | 125.5 | 148.6 |
| 6 | 37.70 | 45.6 | 6 | 41.6 | 49.6 | 6 | 36.5 | 38.9 | 6 | 38.5 | 42.5 |
| 7 | 14.6 | 25.7 | 7 | 19.6 | 28.7 | 7 | 21.4 | 21.9 | 7 | 25.4 | 27.5 |
| 8 | 8.9 | 35.8 | 8 | 9.10 | 38.9 | 8 | 5.6 | 14.6 | 8 | 6.5 | 15.5 |
| 9 | 6.5 | 11.5 | 9 | 8.9 | 12.5 | 9 | 7.6 | 19.6 | 9 | 7.5 | 21.5 |
| 10 | 2.4 | 9.8 | 10 | 3.6 | 14.5 | 10 | 7.3 | 13.5 | 10 | 8.5 | 14.5 |
| 11 | 3.5 | 15.6 | 11 | 6.7 | 22.6 | 11 | 5.7 | 11.6 | 11 | 6.5 | 14.5 |
| 12 | 6.7 | 15.7 | 12 | 2.4 | 11.5 | 12 | 10.6 | 21.6 | 12 | 12.5 | 22.5 |
|  |  |  | 13 | 3.6 | 18.9 | 13 | 22.6 | 29.7 | 13 | 25.5 | 32.5 |
|  |  |  | 14 | 2.5 | 11.5 | 14 | 16.7 | 26.9 | 14 | 18.5 | 29.5 |
|  |  |  | 15 | 2.4 | 21.6 | 15 | 22.5 | 33.5 | 15 | 25.4 | 36.5 |
|  |  |  |  |  |  | 16 | 15.6 | 34.6 | 16 | 18.5 | 39.5 |
|  |  |  |  |  |  | 17 | 9.23 | 24.6 | 17 | 10.5 | 26.5 |
|  |  |  |  |  |  | 18 | 4.5 | 14.6 | 18 | 5.5 | 15.5 |
|  |  |  |  |  |  |  |  |  | 19 | 8.5 | 11.4 |
|  |  |  |  |  |  |  |  |  | 20 | 9.4 | 15.5 |
|  |  |  |  |  |  |  |  |  |  |  |  |

**Soyabean oil and seeds**

| **Branded oil** | | | **Unbranded oil** | | | **Branded seeds** | | | **Unbranded seeds** | | |
| --- | --- | --- | --- | --- | --- | --- | --- | --- | --- | --- | --- |
| **SR. #** | **AFB1** | **TAFs** | **SR.#** | **AFB1** | **TAFs** | **SR. #** | **AFB1** | **TAFs** | **SR.#** | **AFB1** | **TAFs** |
| 1 | 4.5 | 6.5 | 1 | 5.6 | 7.8 | 1 | 6.8 | 11.5 | 1 | 7.8 | 12.5 |
| 2 | 12.5 | 20.5 | 2 | 13.5 | 25.6 | 2 | 47.8 | 67.9 | 2 | 50.4 | 69.8 |
| 3 | 3.4 | 10.5 | 3 | 4.5 | 12.4 | 3 | 5.6 | 15.6 | 3 | 5.4 | 11.3 |
| 4 | 2.5 | 14.6 | 4 | 3.5 | 16.5 | 4 | 4.6 | 19.5 | 4 | 5.7 | 20.5 |
| 5 | 34.6 | 94.5 | 5 | 44.5 | 95.6 | 5 | 48.6 | 93.5 | 5 | 54.6 | 98.5 |
| 6 | 45.6 | 54.6 | 6 | 34.5 | 44.5 | 6 | 36.5 | 57.8 | 6 | 34.6 | 58.7 |
| 7 | 2.5 | 6.7 | 7 | 4.5 | 9.6 | 7 | 5.6 | 10.5 | 7 | 6.5 | 14.5 |
| 8 | 8.9 | 9.5 | 8 | 11.5 | 23.5 |  |  |  | 8 | 7.6 | 23.5 |
| 9 | 10.5 | 11.5 | 9 | 6.7 | 21.4 |  |  |  | 9 | 9.6 | 21.5 |
|  |  |  | 10 | 5.6 | 12.3 |  |  |  |  |  |  |

**Canola oil and seeds**

| **Branded oil** | | | **Unbranded oil** | | | **Branded seeds** | | | **Unbranded seeds** | | |
| --- | --- | --- | --- | --- | --- | --- | --- | --- | --- | --- | --- |
| **SR. #** | **AFB1** | **TF** | **SR.#** | **AFB1** | **TF** | **SR. #** | **AFB1** | **TF** | **SR.#** | **AFB1** | **TF** |
| 1 | 3.4 | 4.5 | 1 | 4.6 | 9.8 | 1 | 6.5 | 11.3 | 1 | 7.65 | 15.5 |
| 2 | 6.7 | 7.5 | 2 | 9.8 | 16.7 | 2 | 10.5 | 19.6 | 2 | 15.5 | 20.5 |
| 3 | 4.5 | 11.4 | 3 | 5.6 | 17.5 | 3 | 5.7 | 20.5 | 3 | 6.5 | 22/4 |
| 4 | 45.6 | 86.7 | 4 | 51.4 | 91.5 | 4 | 61.5 | 110.5 | 4 | 65.5 | 112.5 |
| 5 | 2.5 | 10.5 | 5 | 3.5 | 13.6 | 5 | 4.5 | 15.4 | 5 | 5.5 | 18.5 |
| 6 | 3.6 | 4.5 | 6 | 4.5 | 8.9 | 6 | 3.5 | 10.5 | 6 | 4.5 | 12.5 |
| 7 | 8.9 | 11.5 | 7 | 9.5 | 15.6 | 7 | 10.5 | 15.7 | 7 | 13.5 | 18.6 |
| 8 | 12.6 | 34.6 | 8 | 13.5 | 42.6 | 8 | 15.6 | 48.9 | 8 | 16.5 | 54.3 |
| 9 | 2.4 | 4.6 | 9 | 3.5 | 7.8 | 9 | 4,5 | 9.5 | 9 | 5.4 | 10.5 |
| 10 | 67.8 | 110.8 | 10 | 94.5 | 112.6 | 10 | 96.5 | 115.6 | 10 | 98.5 | 118.5 |
| 11 | 12.5 | 15.7 | 11 | 15.7 | 22.7 | 11 | 16.8 | 25.6 | 11 | 19.5 | 25.6 |
| 12 | 4.5 | 7.8 | 12 | 5.6 | 9.8 | 12 | 6.5 | 10.5 | 12 | 7.5 | 12.5 |
| 13 | 8.5 | 15.6 | 13 | 9.5 | 22.5 | 13 | 10.5 | 25.6 | 13 | 12.5 | 28.5 |
| 14 | 5.6 | 10.4 | 14 | 6.5 | 13.5 | 14 | 7.5 | 15.5 | 14 | 8.5 | 16.5 |
| 15 | 3.4 | 6.7 | 15 | 3.5 | 15.6 |  |  |  | 15 | 4.5 | 15.5 |
| 16 | 4.5 | 13.5 | 16 | 4.6 | 11.4 |  |  |  | 16 | 6.7 | 11.5 |
| 17 | 5.6 | 15.6 | 17 | 5.3 | 16.5 |  |  |  | 17 | 6.8 | 14.5 |
| 18 | 2.3 | 16.7 | 18 | 3.5 | 16.5 |  |  |  | 18 | 6.9 | 13.5 |
|  |  |  | 19 | 5.6 | 11.4 |  |  |  |  |  |  |
|  |  |  | 20 | 2.4 | 8.5 |  |  |  |  |  |  |
|  |  |  | 21 | 3.5 | 6.5 |  |  |  |  |  |  |
|  |  |  | 22 | 4.5 | 8.5 |  |  |  |  |  |  |

**Olive oil and seeds**

| **Branded oil** | | | **Unbranded oil** | | | **Branded seeds** | | | **Unbranded seeds** | | |
| --- | --- | --- | --- | --- | --- | --- | --- | --- | --- | --- | --- |
| **SR. #** | **AFB1** | **TAFs** | **SR.#** | **AFB1** | **TAFs** | **SR. #** | **AFB1** | **TF** | **SR.#** | **AFB1** | **TF** |
| 1 | 2.4 | 5.6 | 1 | 3.5 | 6.7 | 1 | 3.4 | 6.7 | 1 | 6.7 | 11.5 |
| 2 | 3.5 | 9.8 | 2 | 4.5 | 11.5 | 2 | 4.5 | 10.5 | 2 | 6.9 | 15.7 |
| 3 | 2.4 | 11.8 | 3 | 3.4 | 13.5 | 3 | 4.6 | 7.6 | 3 | 9.6 | 15.7 |
| 4 | 34.5 | 58.9 | 4 | 39.8 | 65.6 | 4 | 45.7 | 81.9 | 4 | 55.7 | 86.7 |
| 5 | 37.8 | 44.5 | 5 | 42.5 | 58.7 | 5 | 56.8 | 76.5 | 5 | 58.9 | 78.9 |
| 6 | 2.4 | 7.6 | 6 | 3.4 | 9.8 | 6 | 3.4 | 9.5 | 6 | 4.5 | 6.7 |
| 7 | 2.5 | 4.5 | 7 | 3.5 | 6.5 | 7 | 3.5 | 6.5 | 7 | 7.8 | 13.5 |
| 8 | 2.3 | 6.7 | 8 | 2.6 | 7.8 | 8 | 4.5 | 9.5 | 8 | 5.6 | 14.5 |
|  |  |  | 9 |  |  | 9 |  |  | 9 | 6.7 | 12.4 |
|  |  |  |  |  |  | 10 |  |  | 10 | 2.4 | 4.5 |
|  |  |  |  |  |  | 11 |  |  |  |  |  |
|  |  |  |  |  |  | 12 |  |  |  |  |  |
|  |  |  |  |  |  | 13 |  |  |  |  |  |
|  |  |  |  |  |  | 14 |  |  |  |  |  |
|  |  |  |  |  |  | 15 |  |  |  |  |  |
|  |  |  |  |  |  | 16 |  |  |  |  |  |

**Corn oil and seeds**

| **Branded oil** | | | **Unbranded oil** | | | **Branded seeds** | | | **Unbranded seeds** | | |
| --- | --- | --- | --- | --- | --- | --- | --- | --- | --- | --- | --- |
| **SR. #** | **AFB1** | **TF** | **SR.#** | **AFB1** | **TF** | **SR. #** | **AFB1** | **TF** | **SR.#** | **AFB1** | **TF** |
| 1 | 6.5 | 10.5 | 1 | 7.5 | 13.5 | 1 | 8.5 | 15.6 | 1 | 9.6 | 16.5 |
| 2 | 4.5 | 7.8 | 2 | 5.6 | 9.8 | 2 | 7.8 | 10.7 | 2 | 6.8 | 11.6 |
| 3 | 6.7 | 9.8 | 3 | 8.9 | 11.5 | 3 | 9.6 | 20.5 | 3 | 10.5 | 22.5 |
| 4 | 4.5 | 6.8 | 4 | 9.7 | 15.4 | 4 | 11.4 | 20.6 | 4 | 12.5 | 24.5 |
| 5 | 5.6 | 6.5 | 5 | 6.7 | 9.8 | 5 | 6.8 | 11.5 | 5 | 7.5 | 13.5 |
| 6 | 6.8 | 7.8 | 6 | 7.1 | 7.9 | 6 | 9.6 | 11.5 | 6 | 10.5 | 13.5 |
| 7 | 4.5 | 6.5 | 7 | 5.4 | 7.6 | 7 | 6.8 | 15.6 | 7 | 7.5 | 16.7 |
| 8 | 3.5 | 9.8 | 8 | 5.6 | 8.7 | 8 | 6.7 | 18.9 | 8 | 7.6 | 20.5 |
| 9 | 21.5 | 32.5 | 9 | 29.6 | 44.5 | 9 | 36.5 | 46.5 | 9 | 40.5 | 48.5 |
| 10 | 45.6 | 81.5 | 10 | 48.9 | 84.6 | 10 | 57.6 | 89.7 | 10 | 58.8 | 95.7 |
|  |  |  | 11 | 22.4 | 29.7 | 11 | 26.7 | 36.5 | 11 | 28.6 | 47.8 |
|  |  |  | 12 | 7.8 | 9.5 | 12 | 9.5 | 11.5 | 12 | 10.5 | 15.6 |
|  |  |  | 13 | 2.5 | 11.5 | 13 | 3.5 | 6.7 | 13 | 5.6 | 7.8 |
|  |  |  | 14 | 4.5 | 9.8 | 14 | 5.6 | 7.11 | 14 | 8.9 | 11.5 |
|  |  |  | 15 | 34.6 | 45.6 | 15 | 49.7 | 65.6 | 15 | 57.8 | 87.5 |
|  |  |  | 16 | 8.9 | 11.3 | 16 | 37.8 | 83.6 | 16 | 39.5 | 87.5 |
|  |  |  | 17 | 2.4 | 4.5 | 17 | 2.5 | 7.8 | 17 | 4.5 | 9.7 |
|  |  |  | 18 | 34.6 | 39.7 | 18 | 56.7 | 87.6 | 18 | 59.8 | 95.6 |
|  |  |  | 19 | 3.5 | 6.7 | 19 | 2.5 | 7.8 | 21 | 3.5 | 9.7 |
|  |  |  | 20 | 2.5 | 4.5 | 20 | 3.5 | 7.8 | 22 | 4.5 | 9.8 |
|  |  |  |  |  |  | 21 | 7.8 | 9.4 | 23 | 9.5 | 12.4 |
|  |  |  |  |  |  | 22 | 2.5 | 6.5 | 24 | 3.5 | 9.7 |
|  |  |  |  |  |  | 23 | 4.5 | 6.7 | 25 | 5.6 | 7.8 |
|  |  |  |  |  |  | 24 | 2.4 | 5.6 | 26 | 4.5 | 9.5 |
|  |  |  |  |  |  | 25 | 9.8 | 11.4 | 27 | 10.5 | 15.5 |
|  |  |  |  |  |  |  |  |  | 28 | 4.5 | 9.6 |
|  |  |  |  |  |  |  |  |  | 29 | 3.5 | 10.5 |
|  |  |  |  |  |  |  |  |  | 30 | 2.5 | 15.5 |

**Mustard oil and seeds**

| **Branded oil** | | | **Unbranded oil** | | | **Branded seeds** | | | **Unbranded seeds** | | |
| --- | --- | --- | --- | --- | --- | --- | --- | --- | --- | --- | --- |
| **SR. #** | **AFB1** | **TAFs** | **SR.#** | **AFB1** | **TAFs** | **SR. #** | **AFB1** | **TAFs** | **SR.#** | **AFB1** | **TAFs** |
| 1 | 2.34 | 4.78 | 1 | 4.5 | 9.7 | 1 | 4.6 | 6.7 | 1 | 5.4 | 7.8 |
| 2 | 5.41 | 9.70 | 2 | 6.8 | 11.2 | 2 | 6.5 | 10.6 | 2 | 7.5 | 11.3 |
| 3 | 2.31 | 11.4 | 3 | 4.5 | 13.6 | 3 | 3.5 | 11.9 | 3 | 4.3 | 10.6 |
| 4 | 18.9 | 29.8 | 4 | 21.5 | 34.6 | 4 | 19.3 | 30.5 | 4 | 20.4 | 32.5 |
| 5 | 8.70 | 19.7 | 5 | 9.8 | 23.5 | 5 | 9.5 | 20.6 | 5 | 8.5 | 22.5 |
| 6 | 9.12 | 22.5 | 6 | 10.5 | 24.6 | 6 | 10.5 | 23.5 | 6 | 11.5 | 24.5 |
| 7 | 22.6 | 32.7 | 7 | 24.7 | 36.7 | 7 | 24.5 | 33.6 | 7 | 25.5 | 35.4 |
| 8 | 12.5 | 19.7 | 8 | 14.5 | 39.8 | 8 | 14.5 | 21.6 | 8 | 15.4 | 22.5 |
| 9 | 10.7 | 45.7 | 9 | 16.7 | 55.7 | 9 | 11.6 | 46.7 | 9 | 12.5 | 47.5 |
| 10 | 15.7 | 26.8 | 10 | 17.5 | 29.8 | 10 | 16.6 | 28.9 | 10 | 18.6 | 30.5 |
| 11 | 12.6 | 34.6 | 11 | 14.6 | 36.6 | 11 | 13.5 | 36.7 | 11 | 14.3 | 38.5 |
| 12 | 10.6 | 19.8 | 12 | 12.5 | 22.5 | 12 | 12.5 | 21.5 | 12 | 13.5 | 22.5 |
| 13 | 12.7 | 23.6 | 13 | 14.6 | 25.7 | 13 | 13.5 | 24.5 | 13 | 15.5 | 25.6 |
| 14 | 10.8 | 35.7 | 14 | 12.6 | 38.7 | 14 | 11.5 | 36.8 | 14 | 12.5 | 38.9 |
| 15 | 9.8 | 11.6 | 15 | 11.4 | 13.6 | 15 | 11.4 | 13.4 | 15 | 13.5 | 15.5 |
| 16 | 12.5 | 18.9 | 16 | 13.6 | 21.5 | 16 | 13.5 | 20.5 | 16 | 14.5 | 22.5 |
| 17 | 9.6 | 14.6 | 17 | 10.7 | 16.4 | 17 | 10.5 | 15.6 | 17 | 11.5 | 16.5 |
| 18 | 2.4 | 8.9 | 18 | 3.5 | 10.6 | 18 | 3.5 | 10.5 | 18 | 4.5 | 12.5 |
| 19 | 1.6 | 3.5 | 19 | 2.5 | 5.6 | 19 | 2.5 | 15.6 | 19 | 3.5 | 11.5 |
| 20 | 3.5 | 8.9 | 20 | 5.4 | 9.19 | 20 | 4.5 | 10.8 | 20 | 5.4 | 12.5 |
| 21 | 4.9 | 10.7 | 21 | 6.5 | 11.6 |  |  |  | 21 | 6.5 | 10.8 |
|  |  |  | 22 | 7.9 | 16.8 |  |  |  | 22 | 7.8 | 34.6 |
|  |  |  | 23 | 10.5 | 14.5 |  |  |  | 23 | 19.5 | 21.5 |
|  |  |  | 24 | 11.4 | 18.9 |  |  |  |  |  |  |
|  |  |  | 25 | 12.5 | 16.5 |  |  |  |  |  |  |
|  |  |  | 26 | 10.5 | 14.5 |  |  |  |  |  |  |
|  |  |  | 27 | 9.5 | 10.6 |  |  |  |  |  |  |
|  |  |  | 28 | 4.5 | 8.6 |  |  |  |  |  |  |

**Food Frequency Questionnaire**

| Full Name | Age (y) | Sex |
| --- | --- | --- |
| Weight (kg) | City | District |
| CNIN | Height (m) | Covid 19= Positive/ Negative |

Please put a tick on your concerned line

| Product name | Never experienced | Seldom used | Per day consumption | | | | Per week consumption | Per month consumption |
| --- | --- | --- | --- | --- | --- | --- | --- | --- |
| 150-200 mL | 200- 350 mL | 350-500 mL | >500  mL |
| Sunflower |  |  |  |  |  |  |  |  |
| Soyabean |  |  |  |  |  |  |  |  |
| Canola |  |  |  |  |  |  |  |  |
| Olive |  |  |  |  |  |  |  |  |
| Corn |  |  |  |  |  |  |  |  |
| Mustard |  |  |  |  |  |  |  |  |

Consent: I give my full consent to use my information for research purpose

First Name: ----------------------- **Signature/Date**: ---------------------

Middle Name: ----------------------

Family Name: ---------------------

Education:

Cell No:
